# Supplementary material
Source: publisher figshare collection journal article supplement (https://asha.figshare.com/articles/dataset/_/26237531)
Supplement: Supplementary file 1 [file 1]

Date: 6/23/23

Monday Tuesday Wednesday Thursday Friday Saturday Sunday

Start: 6:00am 7:00am 8:00am 8:30 9:00am 10:00am 11:00am 12:00pm

| Time            | Location:                                                                                   |                                                                                                   | People you talked with:                                                                        |                                                                                                                                   |
|-----------------|---------------------------------------------------------------------------------------------|---------------------------------------------------------------------------------------------------|------------------------------------------------------------------------------------------------|-----------------------------------------------------------------------------------------------------------------------------------|
| Hour 1<br>8:30  | <br>Home   | <br>Community   | <br>Alone   | Who?:<br><br>Breakfast<br>Wilma (cat)          |
| Hour 2<br>9:30  | <br>Home   | <br>Community   | <br>Alone   | Who?:<br><br>T (MBTA)<br>Prudential Center     |
| Hour 3<br>10:30 | <br>Home | <br>Community | <br>Alone | Who?:<br><br>haircuts!                       |
| Hour 4<br>11:30 | <br>Home | <br>Community | <br>Alone | Who?:<br><br>T (MBTA)<br>Museum of fine Arts |
| Hour 5<br>12:30 | <br>Home | <br>Community | <br>Alone | Who?:<br><br>MFA Boston                      |
| Hour 6<br>1:30  | <br>Home | <br>Community | <br>Alone | Who?:<br><br>T (MBTA)<br>LUNCH               |
| Hour 7<br>2:30  | <br>Home | <br>Community | <br>Alone | Who?:<br><br>NAP                             |
| Hour 8<br>3:30  | <br>Home | <br>Community | <br>Alone | Who?:<br><br>NAP                             |

End: 2:00pm 3:00pm 4:00pm 4:30 5:00pm 6:00pm 7:00pm 8:00pm
