# Supplementary material
Source: publisher figshare collection journal article supplement (https://asha.figshare.com/articles/dataset/_/26237531)
Supplement: Supplementary file 2 [file 1]

**Supplemental Material S3.** Selected demographics and self-reported ratings regarding comfort and ease of using wearable devices for participants unable to successfully complete data collection.

| Participant | Age (years) | Gender | Aphasia severity | Laryngeal sensor     |                                  |                                         | GPS tracker          |                                  |                                         |
|-------------|-------------|--------|------------------|----------------------|----------------------------------|-----------------------------------------|----------------------|----------------------------------|-----------------------------------------|
|             |             |        |                  | Comfort <sup>a</sup> | Ease of application <sup>b</sup> | Ease of set-up/ close-down <sup>b</sup> | Comfort <sup>a</sup> | Ease of application <sup>b</sup> | Ease of set-up/ close-down <sup>b</sup> |
| 17          | 58          | M      | Mod              | 5                    | 5                                | 5                                       | —                    | —                                | —                                       |
| 18          | 46          | M      | Mod              | 4                    | 1                                | 5                                       | —                    | —                                | —                                       |
| 19          | 39          | M      | Mod              | —                    | —                                | —                                       | —                    | —                                | —                                       |
| 20          | 38          | M      | Mod              | 5                    | 5                                | 5                                       | 5                    | 5                                | 5                                       |

*Note.* M = male; Mod = Moderate. P17 and P18 completed first iteration of questions, P19 dropped from study prior to elicitation of ratings.

<sup>a</sup> 1 = *not at all*, 5 = *very much*

<sup>b</sup> 1 = *very difficult*, 5 = *very easy*
