# Supplementary material
Source: publisher figshare collection journal article supplement (https://asha.figshare.com/articles/dataset/_/26237531)
Supplement: Supplementary file 3 [file 1]

**Supplemental Material S2.** Feedback questions elicited following data collection.

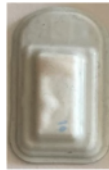

How comfortable was the **sensor** to wear?

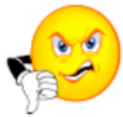

|   |   |   |   |   |
|---|---|---|---|---|
| 1 | 2 | 3 | 4 | 5 |
|---|---|---|---|---|

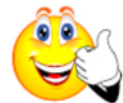

Not at  
all

Some-  
what

Very  
much

How easy was the **sensor** to apply?

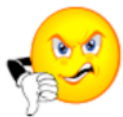

|   |   |   |   |   |
|---|---|---|---|---|
| 1 | 2 | 3 | 4 | 5 |
|---|---|---|---|---|

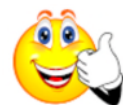

Very  
difficult

Some-  
what

Very  
easy

How easy was it to set up / close down the **sensor**  
**and smartphone**?

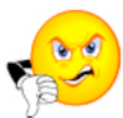

|   |   |   |   |   |
|---|---|---|---|---|
| 1 | 2 | 3 | 4 | 5 |
|---|---|---|---|---|

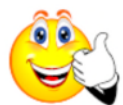

Very  
difficult

Some-  
what

Very  
easy

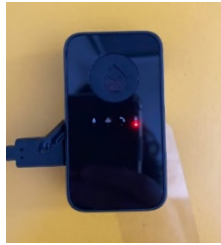

How comfortable was the **GPS** to wear?

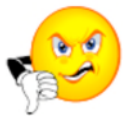

|   |   |   |   |   |
|---|---|---|---|---|
| 1 | 2 | 3 | 4 | 5 |
|---|---|---|---|---|

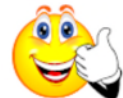

Not at  
all

Some-  
what

Very  
much

How easy was the **GPS** to put on?

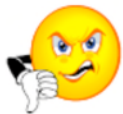

|   |   |   |   |   |
|---|---|---|---|---|
| 1 | 2 | 3 | 4 | 5 |
|---|---|---|---|---|

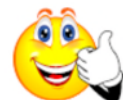

Very  
difficult

Some-  
what

Very  
easy

How easy was it to turn the **GPS** on and off?

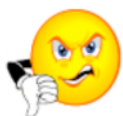

|   |   |   |   |   |
|---|---|---|---|---|
| 1 | 2 | 3 | 4 | 5 |
|---|---|---|---|---|

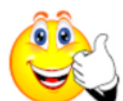

Very  
difficult

Some-  
what

Very  
easy

| Day 1 – Example          |                          |                                     |                          |                          |                          |                          |
|--------------------------|--------------------------|-------------------------------------|--------------------------|--------------------------|--------------------------|--------------------------|
| Monday                   | Tuesday                  | Wednesday                           | Thursday                 | Friday                   | Saturday                 | Sunday                   |
| <input type="checkbox"/> | <input type="checkbox"/> | <input checked="" type="checkbox"/> | <input type="checkbox"/> | <input type="checkbox"/> | <input type="checkbox"/> | <input type="checkbox"/> |
| Start: 6:00am            | 7:00am                   | 8:00am                              | 9:00am                   | 10:00am                  | 11:00am                  | 12:00pm                  |
| <input type="checkbox"/> | <input type="checkbox"/> | <input checked="" type="checkbox"/> | <input type="checkbox"/> | <input type="checkbox"/> | <input type="checkbox"/> | <input type="checkbox"/> |

  

| Time           | Type of Location / Activity                                                                                                      |                                                                                                                       |                                                                                                                      |                                             | People                                                                                                                             |                                                                                                                                           |
|----------------|----------------------------------------------------------------------------------------------------------------------------------|-----------------------------------------------------------------------------------------------------------------------|----------------------------------------------------------------------------------------------------------------------|---------------------------------------------|------------------------------------------------------------------------------------------------------------------------------------|-------------------------------------------------------------------------------------------------------------------------------------------|
| Hour 1<br>8:00 | <br>Home<br><input checked="" type="checkbox"/> | <br>Park<br><input type="checkbox"/> | <br>Gym<br><input type="checkbox"/> | Something else?<br><input type="checkbox"/> | <br>Alone<br><input type="checkbox"/>            | <br>With Others<br><input checked="" type="checkbox"/> |
| Hour 2<br>9:00 | <br>Home<br><input checked="" type="checkbox"/> | <br>Park<br><input type="checkbox"/> | <br>Gym<br><input type="checkbox"/> | Something else?<br><input type="checkbox"/> | <br>Alone<br><input checked="" type="checkbox"/> | <br>With Others<br><input type="checkbox"/>            |

How easy was the **log** to use?

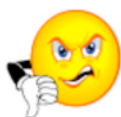

|   |   |   |   |   |
|---|---|---|---|---|
| 1 | 2 | 3 | 4 | 5 |
|---|---|---|---|---|

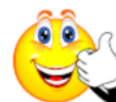

Very  
difficult

Some-  
what

Very  
easy

Additional Feedback?:
